# Supplementary material for: A microextraction procedure based on an ionic liquid as an ion-pairing agent optimized using a design of experiments for chromium species separation and determination in water samples
Source: Royal Society of Chemistry journal article supplement (doi:10.1039/c3ay40617b), 2013-01-01
Supplement: c3ay40617b.pdf [file c3ay40617b.pdf]

Table S1. Probability values obtained when applying ANOVA to the response studied with the Plackett–Burman design built for factor selection. The last columns show the recovery obtained at lower and upper levels.

|                                              | <b>F-value</b> | <b>p-value<sup>a</sup></b> | <b>Recovery at the lower level</b> | <b>Recovery at the upper level</b> |
|----------------------------------------------|----------------|----------------------------|------------------------------------|------------------------------------|
| Model <sup>b</sup>                           | 18.37          | 0.0029                     |                                    |                                    |
| CYPHOS <sup>®</sup> IL 101 concentration (%) | 24.38          | 0.0043 (+)                 | 50.86                              | 82.35                              |
| Ionic strength                               | 21.24          | 0.0058 (-)                 | 81.30                              | 51.91                              |
| Ion-pair formation time (min)                | 8.45           | 0.0335 (-)                 | 75.88                              | 57.33                              |
| Solvent extraction volume (μL)               | 39.18          | 0.0015 (-)                 | 86.56                              | 46.64                              |
| Extraction time (min)                        | 8.51           | 0.0331 (+)                 | 57.30                              | 75.91                              |
| Dummy variable                               | 8.45           | 0.0335 (+)                 | 57.33                              | 75.87                              |

<sup>a</sup>Considered significant when  $p < 0.05$ . Signs between parentheses correspond to the effects on the variables

<sup>b</sup>Statistical significance of the linear model

Table S2. Central composite design used for the optimization of Cr recovery.

| Run | Block | Concentration<br>CYPHOS <sup>®</sup> IL<br>101 (%) | Ion-pair<br>formation<br>time (min) | Extraction<br>time (min) | Solvent<br>extraction<br>volume (μL) | Recovery<br>(%) |
|-----|-------|----------------------------------------------------|-------------------------------------|--------------------------|--------------------------------------|-----------------|
| 1   | Day 1 | 5.25                                               | 7.625                               | 5.75                     | 75                                   | 97.4            |
| 2   | Day 1 | 11.75                                              | 7.625                               | 15.25                    | 75                                   | 64.09           |
| 3   | Day 1 | 8.50                                               | 5.250                               | 10.5                     | 60                                   | 104.36          |
| 4   | Day 1 | 11.75                                              | 2.875                               | 5.75                     | 45                                   | 92.67           |
| 5   | Day 1 | 11.75                                              | 7.625                               | 15.25                    | 45                                   | 88.00           |
| 6   | Day 1 | 11.75                                              | 2.875                               | 5.75                     | 75                                   | 62.07           |
| 7   | Day 1 | 5.25                                               | 7.625                               | 5.75                     | 45                                   | 96.07           |
| 8   | Day 1 | 8.50                                               | 5.250                               | 10.5                     | 60                                   | 100.37          |
| 9   | Day 1 | 11.75                                              | 7.625                               | 5.75                     | 75                                   | 79.03           |
| 10  | Day 1 | 5.25                                               | 2.875                               | 5.75                     | 75                                   | 79.43           |
| 11  | Day 1 | 11.75                                              | 2.875                               | 15.25                    | 75                                   | <b>99.17</b>    |
| 12  | Day 1 | 5.25                                               | 7.625                               | 15.25                    | 45                                   | 77.47           |
| 13  | Day 1 | 5.25                                               | 2.875                               | 15.25                    | 75                                   | 85.63           |
| 14  | Day 1 | 5.25                                               | 7.625                               | 15.25                    | 75                                   | 99.67           |
| 15  | Day 1 | 8.50                                               | 5.250                               | 10.5                     | 60                                   | 102.00          |
| 16  | Day 1 | 8.50                                               | 5.250                               | 10.5                     | 60                                   | 101.73          |
| 17  | Day 1 | 11.75                                              | 7.625                               | 5.75                     | 45                                   | 99.67           |
| 18  | Day 1 | 5.25                                               | 2.875                               | 15.25                    | 45                                   | 100.20          |
| 19  | Day 1 | 5.25                                               | 2.875                               | 5.75                     | 45                                   | 96.27           |
| 20  | Day 1 | 11.75                                              | 2.875                               | 15.25                    | 45                                   | 94.20           |
| 21  | Day 2 | 8.50                                               | 0.500                               | 10.50                    | 60                                   | 73.90           |
| 22  | Day 2 | 8.50                                               | 5.250                               | 10.50                    | 30                                   | 97.27           |
| 23  | Day 2 | 8.50                                               | 5.250                               | 10.50                    | 90                                   | 63.08           |
| 24  | Day 2 | 8.50                                               | 5.250                               | 10.50                    | 60                                   | 99.07           |
| 25  | Day 2 | 8.50                                               | 5.250                               | 1.00                     | 60                                   | 69.05           |
| 26  | Day 2 | 8.50                                               | 5.250                               | 10.50                    | 60                                   | 100.43          |
| 27  | Day 2 | 8.50                                               | 10.000                              | 10.50                    | 60                                   | 101.67          |
| 28  | Day 2 | 15.00                                              | 5.250                               | 10.50                    | 60                                   | 99.37           |
| 29  | Day 2 | 2.00                                               | 5.250                               | 10.50                    | 60                                   | 71.27           |

|    |       |      |       |       |    |       |
|----|-------|------|-------|-------|----|-------|
| 30 | Day 2 | 8.50 | 5.250 | 20.00 | 60 | 81.10 |
|----|-------|------|-------|-------|----|-------|

---

Experimental value corresponding to run 11 was removed of the design matrix because it was an outlier.
